# Supplementary material for: Conductive and Adhesive Granular Alginate Hydrogels for On-Tissue Writable Bioelectronics
Source: MDPI journal article supplement (doi:10.3390/gels9020167), 2023-02-19
Supplement: s1 [file s1]

## Article

# Conductive and Adhesive Granular Alginate Hydrogels for On-Tissue Writable Bioelectronics

Sumin Kim <sup>1</sup>, Heewon Choi <sup>2</sup>, Donghee Son<sup>2,3,\*</sup> and Mikyung Shin <sup>1,4,\*</sup>

<sup>1</sup> Department of Intelligent Precision Healthcare Convergence, Sungkyunkwan University (SKKU), Suwon 16419, Korea

<sup>2</sup> Department of Electrical and Computer Engineering, Sungkyunkwan University (SKKU), Suwon 16419, Korea

<sup>3</sup> Department of Superintelligence Engineering, Sungkyunkwan University (SKKU), Suwon 16419, Korea

<sup>4</sup> Department of Biomedical Engineering, Sungkyunkwan University (SKKU), Suwon 16419, Korea

\* Correspondence: daniel3600@g.skku.edu (D.S.); mikyungshin@g.skku.edu (M.S.)

## Supplementary Materials

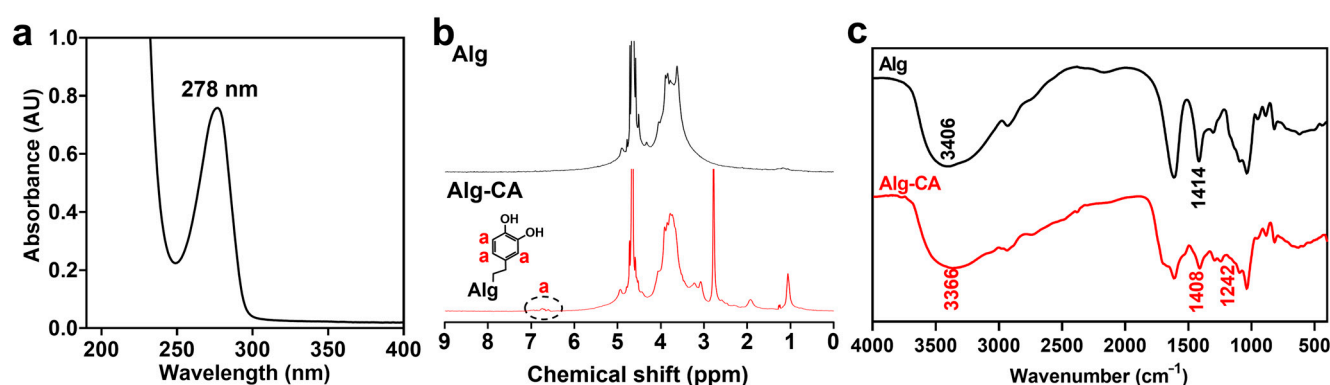

**Figure S1.** UV-Vis spectra of fabricated Alg-CA. **a.** The degree of conjugation of dopamine on alginate was calculated by UV absorbance value at 278 nm. **b.** <sup>1</sup>H NMR spectrum of Alg (black) and Alg-CA (red). The peaks at 6.5–7.1 ppm indicate 'a' protons present in aromatic rings of catechol groups. **c.** FT-IR spectra of Alg (black) and Alg-CA (red). By conjugation of catechol on the polymer, the O-H stretching peak at 3406 cm<sup>-1</sup> for Alg was shifted to 3366 cm<sup>-1</sup> for Alg-CA, C-O stretching peak of carboxylic acid at 1414 cm<sup>-1</sup> for Alg was shifted to 1408 cm<sup>-1</sup> for Alg-CA, O-H stretching peak of phenol appeared at 1290 cm<sup>-1</sup> in Alg-CA spectra.

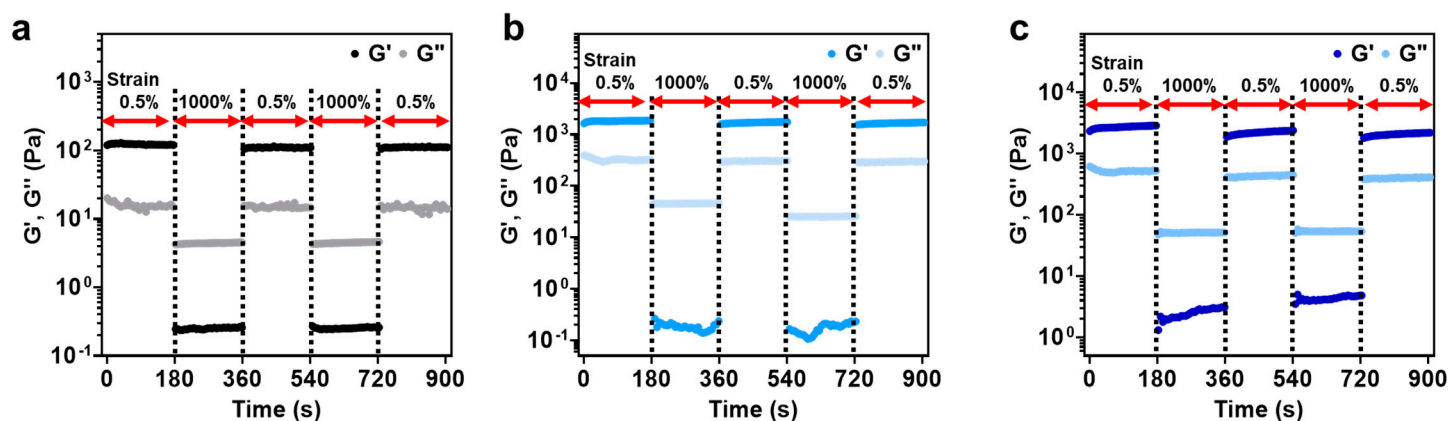

**Figure S2.** Self-healing property of hydrogels. a-c. Rheological measurement for self-healing property of AC (a), ACP<sub>0.5</sub> (b), and ACP<sub>1</sub> (c).

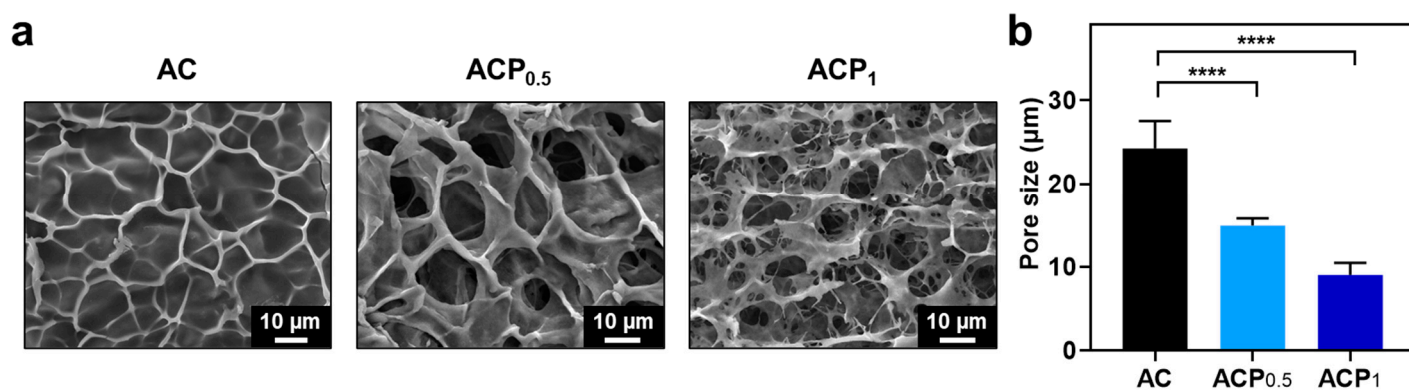

**Figure S3.** Cross-sectional SEM analysis of AC and ACPs. a. The SEM images of AC (left), ACP<sub>0.5</sub> (middle), and ACP<sub>1</sub> (right). b. Quantification of the pore size of AC (black), ACP<sub>0.5</sub> (light blue), and ACP<sub>1</sub> (blue). One-way ANOVA, \*\*\*\* $p < 0.0001$ .
